# Supplementary material for: Single molecule analysis of combinatorial splicing
Source: PubMed Central journal article supplement — Nucleic Acids Res. 2010 Jun 29;38(16):e163. doi: 10.1093/nar/gkq581 (PMC2938221; doi:10.1093/nar/gkq581), 2010-06-29
Supplement: supp_gkq581_Supplementary_tables.pdf [file supp_gkq581_Supplementary_tables.pdf]

| Name           | Sequence                                                                                  | Function                 |
|----------------|-------------------------------------------------------------------------------------------|--------------------------|
| Adeno A        | 5'-CTTTCTACCGTTATCGTGGCGCTAATTACAGCGGGATTATAAGTCTTTTGGACCAGCTGATCGAAGAG                   | 5' adenovirus probe      |
| Adeno B        | 5'-GTA CTGGCTGATAATCTTCCACCTCCGTATCTGCTTATGTCGCCCCGCGCCTCACCTTTCCC GGCAG                  | adenovirus probe         |
| Adeno C        | 5'-CCC GAGCAGCCGGAGCAGTCGATAGTCACGGCTACTCAGTGACGACGAGGATGAAGAG G                          | adenovirus probe         |
| Adeno D        | 5'-GTGAGGAGTTTGTGTTAGATTATGTGGAGCGATCTGCGAGACCGTATGAGGACCTGTGG CATGTTTGTCTACA             | adenovirus probe         |
| Adeno E        | 5'-GTAAGTGAAAATTATGGGCAGTCGGTGCCTCAATGCTGCTGCTGTACTACGGTTTAAAGA ATTTTGTATTGTGATTTTTTAAAAG | adenovirus probe         |
| Adeno F        | 5'-GTCCTGTGTCTGAACCTGAGCCTTTCTCGACCGTTAGCAAAG                                             | 3' adenovirus probe      |
| Actin A        | 5'-CTTTCTACCGTTATCGTGGCTCCACTAAATAGACGCACCCGCCGCCAGCTCACC                                 | 5' actin probe           |
| Actin B        | 5'-ATGGATGATGATATCGCCGCGTATCTGCTTATGTCGCCCCGCGCCCCAGGCACCAG                               | actin probe              |
| Actin C        | 5'-GGCGTGATGGTGGGCATGGAGTCGATAGTCACGGCTACTGCCAGAGCAAGAGAGGCAT CC                          | actin probe              |
| Actin D        | 5'-TCACCCTGAAGTACCCCATCGAGCTTTCTCGACCGTTAGCAAAG                                           | 3' actin probe           |
| Actin A 55C    | 5'-CTTTCTACCGTTATCGTGGCTCCACTAAATAGACGCACCCGCCGCCAGCTCACC                                 | 5' actin probe           |
| Actin B 55C    | 5'-ATGGATGATGATATCGCCGCGTATCTGCTTATGTCGCCCCGCGCCCCAGGCACCAG                               | actin probe              |
| Actin C 55C    | 5'-GGCGTGATGGTGGGCAAGTCGATAGTCACGGCTACTCCAGAGCAAGAGAGGCATCC                               | actin probe              |
| Actin D 55C    | 5'-TCACCCTGAAGTACCCCATTTCTCGACCGTTAGCAAAG                                                 | 3' actin probe           |
| Forward primer | 5'-CTTTCTACCGTTATCGTGGC                                                                   | sense primer             |
| Reverse primer | 5'biotin-GTTTCTTCTTTGCTAACGGTCGAGAAA                                                      | antisense primer         |
| CircTemp       | ACGATAACGGTAGAAAGCTTTGCTAACGGTCGAG                                                        | circularization template |
| Adeno DO       | 5'FITC-CGCTAATTACAGCGGGATTATAA                                                            | decoding probe           |

| Name         | Sequence                         | Function          |
|--------------|----------------------------------|-------------------|
| Actin DO     | 5'FITC-GGCTCCACTAAATAGACGCA      | decoding probe    |
| Exon B DO    | 5'Cy5-CCACGCGTATCTGCTTATGTGCCCCG | decoding probe    |
| Exon C DO    | 5'Cy3-AGTCGATAGTCACGGCTACT       | decoding probe    |
| Exon D DO    | 5'Cy3-AGCGATCTGCGAGACCGTAT       | decoding probe    |
| Exon E DO    | 5'Cy5-CCTCAATGCTGCTGCTGTACTAC    | decoding probe    |
| Act1348-1367 | CTGGAACGGTGAAGGTGACA             | actin cDNA primer |
| Act1412-1393 | CGGCCACATTGTGAACTTTG             | actin cDNA primer |
| Act22-41     | GAGCCTCGCCTTTGCCGATC             | actin cDNA primer |
| Act80-61     | CATCCATGGTGAGCTGGCGG             | actin cDNA primer |

*Supplementary 1: Oligonucleotides used in this study*

*Supplementary table 2: Specificity test of the spliceotyping method using pure cDNAs as target. Standard deviations between three fields of vision are shown.*

| Input cDNA | Number of counted RCPs | Classified ABCDF | as ABCF    | ACDF      | ACF       | AF          |
|------------|------------------------|------------------|------------|-----------|-----------|-------------|
| AF         | 17,208                 | 0.0%±0.0%        | 0.0%±0.0%  | 0.0%±0.0% | 0.0%±0.0% | 100.0%±0.0% |
| ABCF       | 5,211                  | 1.2%±0.2%        | 98.1%±0.2% | 0.0%±0.0% | 0.7%±0.1% | 0.1%±0.0%   |
| ABCDF      | 11,265                 | 96.1%±0.8%       | 0.9%±0.8%  | 3.0%±0.8% | 0.0%±0.0% | 0.0%±0.0%   |

Supplementary table 3: Proportions of adenoviral and actin splice patterns during adenovirus infection reflected by the spliceotyping method. Standard deviations between three fields of vision are shown.

| Time post infection | Number of counted RCPs | Classified as |       |       |       |         |         |
|---------------------|------------------------|---------------|-------|-------|-------|---------|---------|
|                     |                        | ABCDF         | ABCF  | ACDF  | ACF   | AF      | Actin   |
| 6h                  | 2,333                  | 10%±6%        | 1%±0% | 1%±2% | 0%±0% | 5%±2%   | 83%±10% |
| 12h                 | 762                    | 29%±15%       | 0%±0% | 4%±4% | 0%±0% | 6%±2%   | 61%±17% |
| 24h                 | 3,436                  | 10%±5%        | 1%±0% | 3%±2% | 1%±0% | 73%±22% | 12%±16% |
| 36h                 | 13,503                 | 3%±0%         | 0%±0% | 4%±2% | 0%±0% | 92%±2%  | 0%±0%   |
| 48h                 | 1,154                  | 10%±4%        | 0%±0% | 9%±3% | 0%±0% | 76%±6%  | 5%±1%   |
